# Supplementary material for: A Comprehensive Subcellular Proteomic Survey of Salmonella Grown under Phagosome-Mimicking versus Standard Laboratory Conditions
Source: PubMed Central journal article supplement (PMC3410353; doi:10.1155/2012/123076), 2012-07-25

**WT**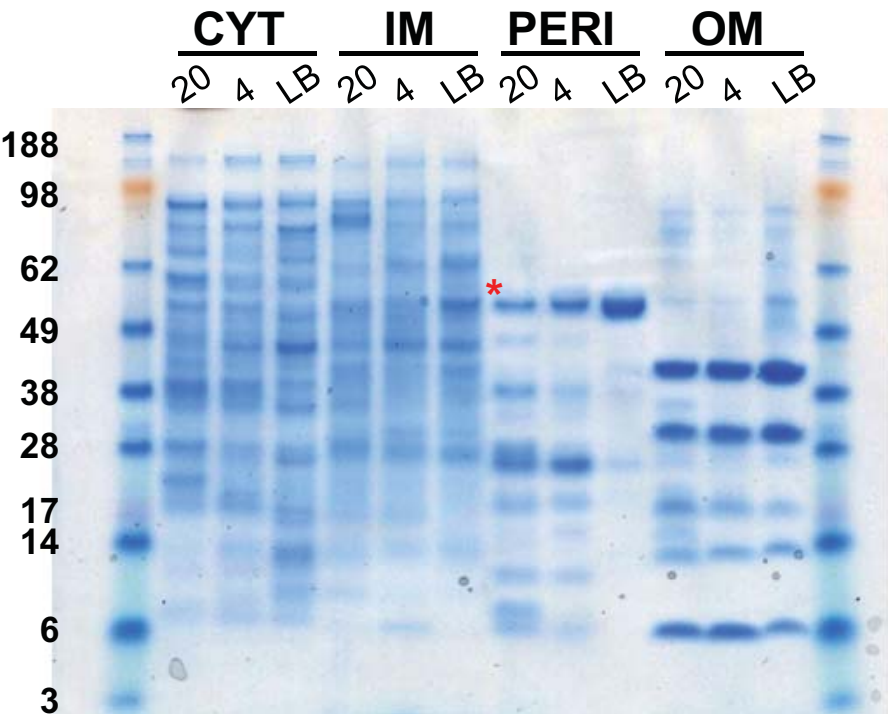 **$\Delta$ fliC/ $\Delta$ fliJ**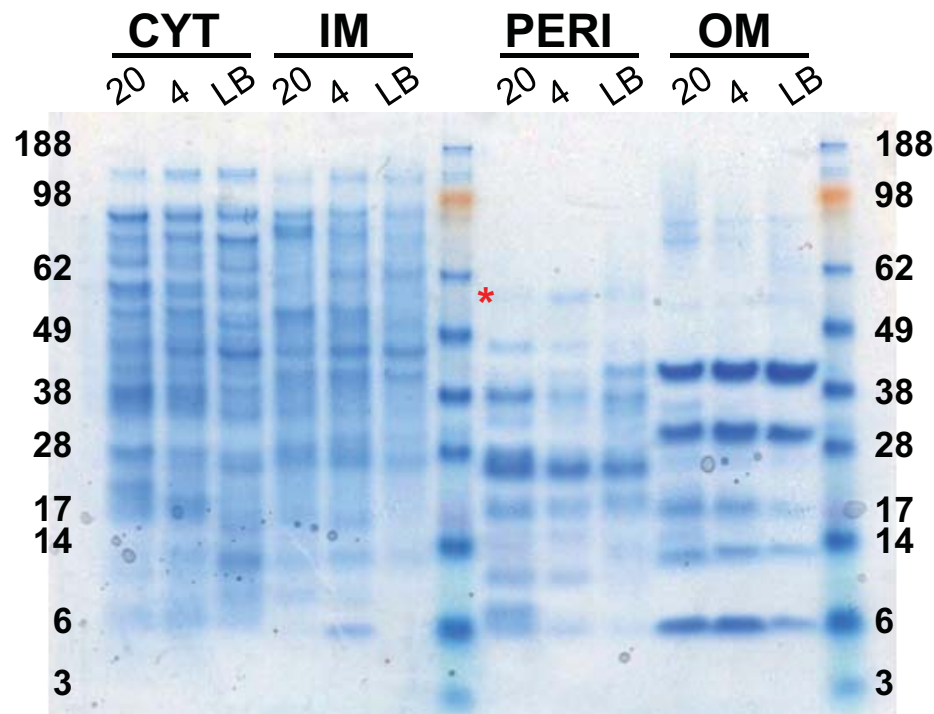

Supplement: 123076.f1.pdf [file 123076.f1.pdf]
